# Supplementary material
Source: MDPI journal article supplement (https://www.mdpi.com/2079-6412/12/3/310)
Supplement: s1 [file s1 › coatings-1500623-supplementary.pdf]

# Supplementary Materials: Effects of Modified Atmosphere Packaging, Storage Temperature, and Absorbent Pads on the Quality of Fresh Cape Hake Fish Fillets

Umezuruike Linus Opara <sup>1,2,\*</sup>, Tobi Fadiji <sup>1</sup>, Oluwafemi James Caleb <sup>1,3</sup> and Adebajji Olasupo Oluwole <sup>1</sup>

<sup>1</sup> SARChI Postharvest Technology Research Laboratory, Africa Institute for Postharvest Technology, Faculty of AgriSciences, Stellenbosch University, Stellenbosch 7602, South Africa; fadiji@sun.ac.za (T.F.); oluwafemi@sun.ac.za (O.J.C.); astsupo@yahoo.com (A.O.O.)

<sup>2</sup> UNESCO International Centre for Biotechnology, Nsukka 410001, Enugu State, Nigeria

<sup>3</sup> Department of Food Science, Africa Institute for Postharvest Technology, Faculty of AgriSciences, Stellenbosch University, Stellenbosch 7602, South Africa

\* Correspondence: opara@sun.ac.za

**Table S1.** Effect of packaging with/without absorbent pads, temperature (0, 4, and 8 °C) and storage time on firmness (work of shear (N/s)) of Cape hake fillet.

| STORAGE DAYS | TEMP. (°C) | MAP – PAD                 | MAP + PAD                  | PMAP – PAD                | PMAP + PAD                |
|--------------|------------|---------------------------|----------------------------|---------------------------|---------------------------|
| 0            | –          | 838.9 ± 3.79 <sup>a</sup> | 838.9 ± 3.79 <sup>a</sup>  | 838.9 ± 3.79 <sup>a</sup> | 838.9 ± 3.79 <sup>a</sup> |
| 3            | 0          | 814.0 ± 0.06 <sup>b</sup> | 819.4 ± 1.22 <sup>ab</sup> | 649.7 ± 2.30 <sup>f</sup> | 675.3 ± 2.54 <sup>e</sup> |
|              | 4          | 807.7 ± 2.31 <sup>c</sup> | 812.1 ± 0.06 <sup>c</sup>  | 517.1 ± 0.52 <sup>l</sup> | 563.4 ± 1.16 <sup>h</sup> |
|              | 8          | 741.2 ± 0.06 <sup>d</sup> | 749.2 ± 1.97 <sup>d</sup>  | 512.7 ± 0.71 <sup>m</sup> | 539.3 ± 0.94 <sup>j</sup> |
| 6            | 0          | 809.7 ± 0.45 <sup>c</sup> | 814.4 ± 1.29 <sup>bc</sup> | 524.0 ± 0.37 <sup>k</sup> | 538.3 ± 0.26 <sup>j</sup> |
|              | 4          | 799.4 ± 4.62 <sup>c</sup> | 809.0 ± 1.28 <sup>c</sup>  | nd                        | nd                        |
| 9            | 0          | 665.9 ± 2.02 <sup>e</sup> | 673.0 ± 0.02 <sup>e</sup>  | nd                        | nd                        |
|              | 4          | 635.8 ± 1.32 <sup>g</sup> | 648.5 ± 2.77 <sup>f</sup>  | nd                        | nd                        |
| 12           | 0          | 527.2 ± 1.85 <sup>j</sup> | 543.3 ± 2.39 <sup>i</sup>  | nd                        | nd                        |
|              | 4          | 506.4 ± 0.72 <sup>n</sup> | 523.8 ± 0.54 <sup>k</sup>  | nd                        | nd                        |

nd = Not determined due to sensory rejection; All values rounded off to one significant figure; Different letters indicate significant difference in pH values ( $p < 0.05$ ); MAP – PAD: active-MA without absorbent pad; MAP + PAD: active-MA with absorbent pad, PMAP – PAD: passive-MA without absorbent pad and PMAP + PAD: passive-MA with absorbent pad.

Sampling was stopped on days when sensory spoilage was observed thus, sampling for fillets stored under MAP at 8°C was stopped on day 3, similarly, sampling for fillets stored under PMAP at 4 and 8°C were stopped on day 3 as well. Also, sampling for fillets stored under PMAP at 0°C was stopped on day 6.

**Table S2.** Effects of packaging with/without absorbent pads (MAP + PAD, MAP – PAD, PMAP + PAD, and PMAP – PAD), temperature (0, 4, and 8 °C), and storage time (3–12 days) on total color difference of Cape hake fillet.

| STORAGE DAYS | TEMP. (°C) | MAP – PAD                | MAP + PAD               | PMAP – PAD               | PMAP + PAD               |
|--------------|------------|--------------------------|-------------------------|--------------------------|--------------------------|
| 3            | 0          | 1.0 ± 0.06 <sup>n</sup>  | 0.9 ± 0.07 <sup>n</sup> | 1.9 ± 0.044 <sup>l</sup> | 1.8 ± 0.044 <sup>m</sup> |
|              | 4          | 2.6 ± 0.15 <sup>k</sup>  | 2.6 ± 0.16 <sup>j</sup> | 5.1 ± 0.49 <sup>g</sup>  | 2.9 ± 0.18 <sup>i</sup>  |
|              | 8          | 5.7 ± 0.21 <sup>f</sup>  | 3.6 ± 0.37 <sup>h</sup> | 5.8 ± 0.72 <sup>e</sup>  | 5.8 ± 0.25 <sup>e</sup>  |
| 6            | 0          | 4.8 ± 0.14 <sup>g</sup>  | 2.8 ± 0.09 <sup>i</sup> | 8.3 ± 0.46 <sup>b</sup>  | 5.9 ± 0.41 <sup>f</sup>  |
|              | 4          | 8.9 ± 0.48 <sup>d</sup>  | 5.5 ± 0.20 <sup>e</sup> | nd                       | nd                       |
| 9            | 0          | 5.8 ± 0.35 <sup>e</sup>  | 3.1 ± 0.25 <sup>i</sup> | nd                       | nd                       |
|              | 4          | 9.3 ± 0.32 <sup>b</sup>  | 5.6 ± 0.42 <sup>f</sup> | nd                       | nd                       |
| 12           | 0          | 5.9 ± 0.17 <sup>ef</sup> | 3.1 ± 0.05 <sup>i</sup> | nd                       | nd                       |
|              | 4          | 9.9 ± 0.42 <sup>a</sup>  | 5.7 ± 0.42 <sup>e</sup> | nd                       | nd                       |

nd = Not determined due to sensory rejection; All values rounded off to one significant figure; Different letters indicate significant difference in pH values ( $p < 0.05$ ); MAP – PAD: active-MA without pad; MAP + PAD: active-MA with pad, PMAP – PAD: passive-MA without pad and PMAP + PAD: passive-MA with pad. Sampling was stopped on days when sensory spoilage was observed thus, sampling for fillets stored under MAP at 8 °C was stopped on day 3, similarly, sampling for fillets stored under PMAP at 4 and 8 °C were stopped on day 3 as well. Also, sampling for fillets stored under PMAP at 0 °C was stopped on day 6.

**Table S3.** Effects of packaging with/without absorbent pads, temperature (0, 4, and 8 °C), and storage time (days) on bacterial growth of Cape hake fillet.

| STORAGE DAYS | TEMP. (°C) | MAP – PAD               | MAP + PAD               | PMAP – PAD              | PMAP + PAD              |
|--------------|------------|-------------------------|-------------------------|-------------------------|-------------------------|
| 0 (Harvest)  | -          | 1.2 ± 0.13 <sup>j</sup> |
| 3            | 0          | 3.6 ± 0.07 <sup>i</sup> | 3.5 ± 0.05 <sup>i</sup> | 3.9 ± 0.05 <sup>g</sup> | 3.7 ± 0.09 <sup>h</sup> |
|              | 4          | 3.8 ± 0.04 <sup>h</sup> | 3.6 ± 0.01 <sup>h</sup> | 6.2 ± 0.09 <sup>c</sup> | 6.2 ± 0.03 <sup>c</sup> |
|              | 8          | 6.2 ± 0.07 <sup>c</sup> | 6.2 ± 0.02 <sup>c</sup> | 6.5 ± 0.01 <sup>b</sup> | 6.5 ± 0.01 <sup>b</sup> |
| 6            | 0          | 4.5 ± 0.04 <sup>f</sup> | 4.5 ± 0.04 <sup>f</sup> | 7.1 ± 0.1 <sup>a</sup>  | 6.9 ± 0.03 <sup>a</sup> |
|              | 4          | 4.8 ± 0.03 <sup>e</sup> | 4.8 ± 0.03 <sup>e</sup> | nd                      | nd                      |
| 9            | 0          | 5.0 ± 0.03 <sup>e</sup> | 4.9 ± 0.03 <sup>e</sup> | nd                      | nd                      |
|              | 4          | 6.0 ± 0.03 <sup>d</sup> | 5.9 ± 0.03 <sup>d</sup> | nd                      | nd                      |
| 12           | 0          | 5.2 ± 0.03 <sup>e</sup> | 5.1 ± 0.03 <sup>e</sup> | nd                      | nd                      |
|              | 4          | 7.2 ± 0.03 <sup>a</sup> | 7.2 ± 0.03 <sup>a</sup> | nd                      | nd                      |

nd = Not determined due to sensory rejection; All values rounded off to one significant figure; Different letters indicate significant difference in pH values ( $p < 0.05$ ); MAP – PAD: active-MA without absorbent pad; MAP + PAD: active-MA with absorbent pad, PMAP – PAD: passive-MA without absorbent pad and PMAP + PAD: passive-MA with absorbent pad. Sampling was stopped on days when sensory spoilage was observed thus, sampling for fillets stored under MAP at 8 °C was stopped on day 3, similarly, sampling for fillets stored under PMAP at 4 and 8 °C were stopped on day 3 as well, furthermore, sampling for fillets stored under PMAP at 0 °C was stopped on day 6.
